# Supplementary material for: A 132 bp deletion affecting the KCNQ1OT1 gene associated with Silver-Russell syndrome clinical phenotype
Source: HighWire-hosted journal article supplement (doi:10.1136/jmedgenet-2021-108288), 2022-06-30
Supplement: jmedgenet-2021-108288supp001_data_supplement.pdf [file jmedgenet-2021-108288supp001_data_supplement.pdf]

**A**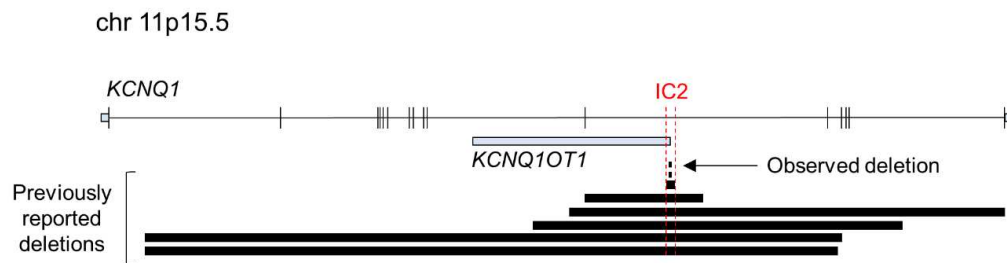**B**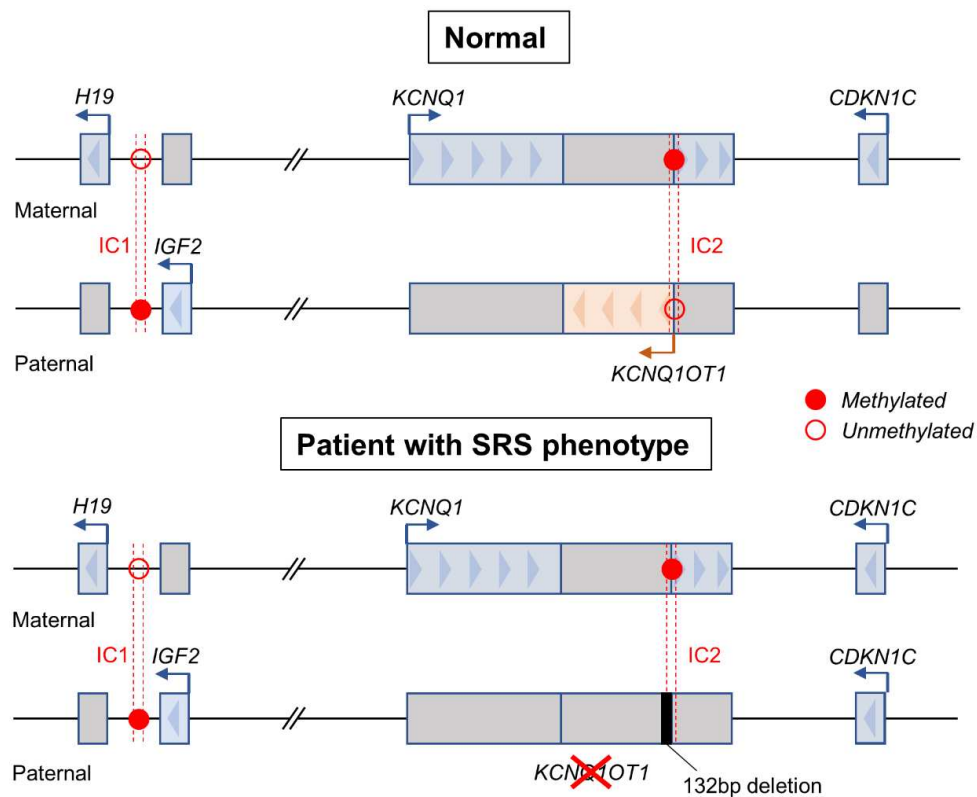

Figure S1: Selective methylation of maternally and paternally inherited copies of chromosome 11 at imprinting centers 1 and 2 (chr11p15.5). A) Previously reported deletions within the *KCNQ1* gene. B) Overview of the proposed model for gene expression and methylation events in the observed patient with SRS phenotype.

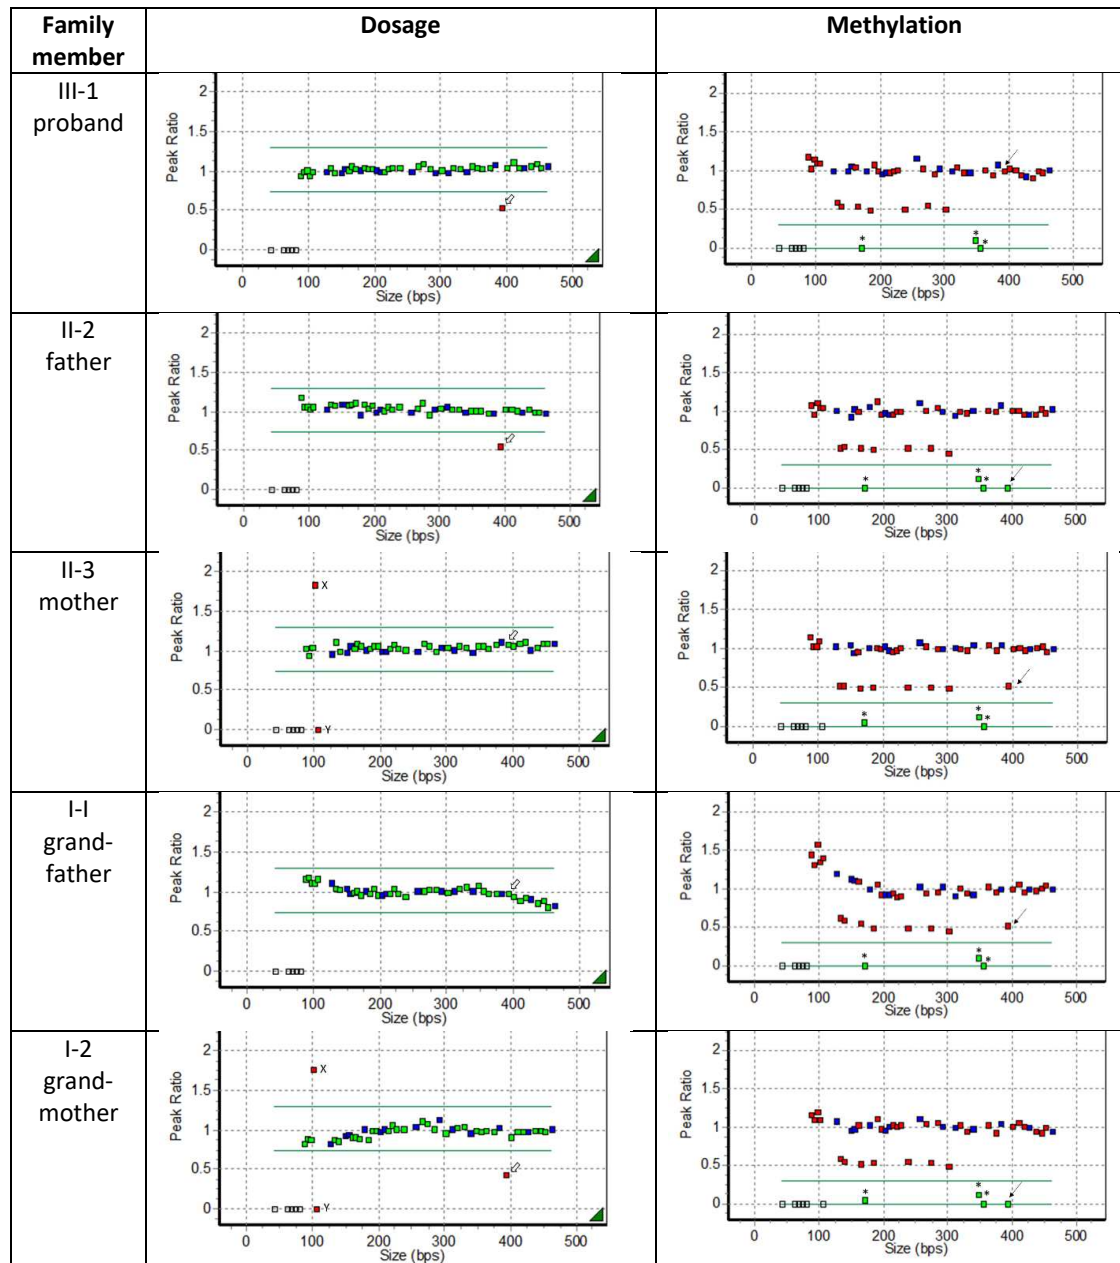

Figure S2. MS-MLPA data plots. The left and right panels show dosage and methylation data, respectively. Left: MS-MLPA probe 07172-L06781 (open arrow) shows the presence of a heterozygous loss in the proband (III-1), father (II-2) and grandmother (I-2). Right: In total eight methylation sensitive probes are assessed in this assay. Normally, the methylation sensitive regions are 50% methylated, which shows as a ratio of 0.5 in the plot. Four of the methylation-sensitive probes target *KCNQ1OT1* in IC2, including MS-MLPA probe 07172-L06781. The latter probe (black arrow) has a hypermethylation signature in the proband (III-1) and hypomethylation in father (II-2) and grandmother (I-2), respectively. The asterisk shows control probes.

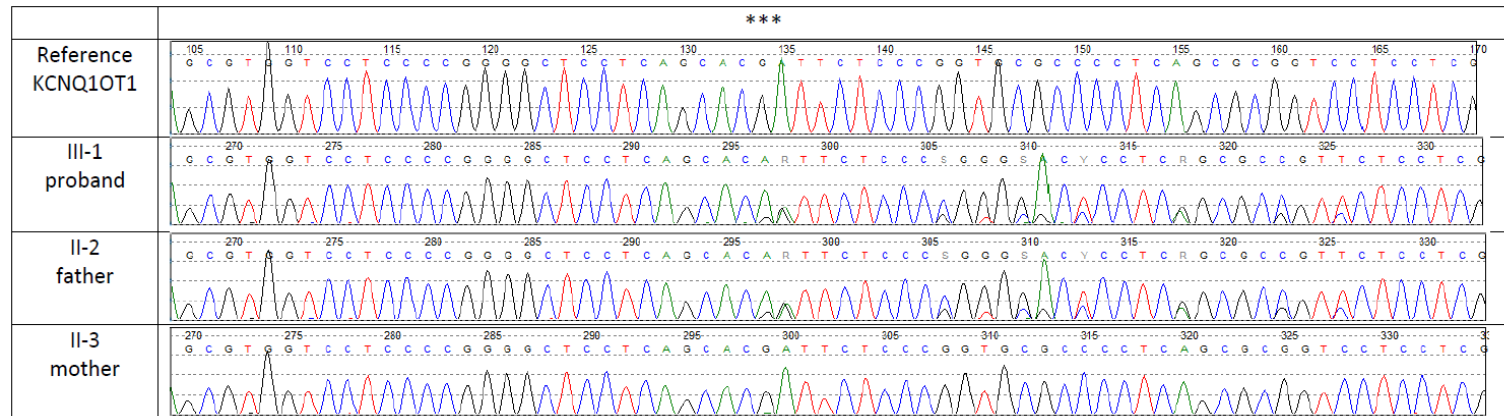

Figure S3. Sanger sequencing detects a 132-bp deletion in *KCNQ1OT1*. Sanger traces show a heterozygous 132-bp deletion in the *KCNQ1OT1* gene (NR\_002728.3) in the proband (III-1) and his unaffected father (II-2). The asterisks indicate the site of the deletion. The sequence from unaffected mother of the proband corresponds to the reference sequence.

Table S1: Overview of reported cases of deletions within imprinting centre 2 (IC2)

| Deletion size | Subjects & family members  | Inheritance | Condition   | Phenotype                                                                                                                                                                               | <i>KCNQ1OT1</i> | <i>KCNQ1</i> | Genomic position (hg19)   | Reference                 |
|---------------|----------------------------|-------------|-------------|-----------------------------------------------------------------------------------------------------------------------------------------------------------------------------------------|-----------------|--------------|---------------------------|---------------------------|
| 250 kb        | Daughter (III-1)           | Maternal    | BWS         | Prenatal overgrowth, ear creases and pits, undescended testes, macroglossia                                                                                                             | Total gene      | Exons 1b-14  | -                         | Neimitz et al., 2004      |
|               | Son (III-2)                | Maternal    | BWS         | Stillborn at 28 weeks, prenatal overgrowth and macroglossia                                                                                                                             |                 |              |                           |                           |
|               | Son (III-4)                | Maternal    | BWS         | Hemihypertrophy of right arm and leg, hypospadias, cleft palate, midline abdominal wall defect, ear pits and creases, undescended testes, macroglossia                                  |                 |              |                           |                           |
|               | Mother (II-2)              | (Paternal)  | Healthy     | Normal                                                                                                                                                                                  |                 |              |                           |                           |
| 330 kb        | Daughter (III-1)           | Maternal    | BWS         | Exomphalos, magroglossia, hypoglycemia, naevus flammeus, coarse facial appearance with upturned nose and right ear creases                                                              | Total gene      | Introns 1-15 | -                         | Algar et al., 2011        |
|               | Maternal Uncle (II-1)      | Maternal    | BWS         | Macroglossia, naevus flammeus, hypoglycemia                                                                                                                                             |                 |              |                           |                           |
|               | Mother (II-2)              | Maternal    | BWS         | Macroglossia, naevus flammeus, umbilical hernia                                                                                                                                         |                 |              |                           |                           |
|               | Maternal Grandmother (I-2) | Paternal    | Healthy     | Normal                                                                                                                                                                                  |                 |              |                           |                           |
| 198 kb        | Daughter                   | Maternal    | BWS         | Height disproportionately elevated, coarse facial appearance with proptosis, hypertelorism, upslanting palpebral fissures, M shaped upper lip, wide mandibule, prognathism, ear creases | Total gene      | Exons 11-16  | Chr11:2,671,855-2,870,191 | Gurrieri et al., 2013     |
|               | Mother                     | (Paternal)  | Healthy     | Short stature                                                                                                                                                                           |                 |              |                           |                           |
| 60 kb         | Fetus 1                    | Paternal    | Severe IUGR | Fetal demise at 27 weeks, no malformations                                                                                                                                              | Most 5' 40 kb   | Exon 11      | Chr11:2,679,858-2,739,436 | De Crescenzo et al., 2013 |
|               | Fetus 2                    | Paternal    | Severe IUGR | Fetal demise at 27 weeks, no malformations                                                                                                                                              |                 |              |                           |                           |

|        |                         |                            |                          |                                                                                                                                                                                                                                                               |                         |                |                               |                            |
|--------|-------------------------|----------------------------|--------------------------|---------------------------------------------------------------------------------------------------------------------------------------------------------------------------------------------------------------------------------------------------------------|-------------------------|----------------|-------------------------------|----------------------------|
| 164 kb | Case 3                  | <i>De novo</i><br>paternal | SRS                      | IUGR, ventriculoseptal defect, post-natal growth failure, mild speech delay, triangular face with pointy chin, downturned mouth, fifth finger clinodactyly, hypoglycemia                                                                                      | Total gene              | Exons<br>11-15 | Chr11:2,656,42<br>1-2,820,617 | Cytrynbaum<br>et al., 2016 |
| 1.4 kb | Daughter                | Paternal                   | Mild SRS                 | IUGR, low birth weight and length, growth failure, protruding forehead, apocrine sweating, clinodactyly, precocious puberty                                                                                                                                   | 5' end with<br>promoter | Intron 11      | Chr11:2,720,67<br>4-2,722,054 | Mio et al.,<br>2021        |
|        | Father                  | Maternal                   | Healthy                  | Normal                                                                                                                                                                                                                                                        |                         |                |                               |                            |
|        | Paternal<br>Grandmother | Paternal                   | Healthy                  | Short stature                                                                                                                                                                                                                                                 |                         |                |                               |                            |
| 132 bp | Daughter                | Paternal                   | SGA,<br>Short<br>stature | Growth delay, prominent forehead, low set prominent ears, downturned corners of mouth                                                                                                                                                                         | 132 bp in exon 1        | Intron 11      | Chr11:2,720,96<br>4-2,721,095 | Eggermann<br>et al., 2021  |
|        | Father                  | (Maternal)                 | Healthy                  | Normal                                                                                                                                                                                                                                                        |                         |                |                               |                            |
| 132 bp | Son                     | Paternal                   | SRS<br>phenotype         | IUGR, feeding difficulties, head sparing failure to thrive, ADHD, motor and speech delay, learning difficulties, ODD, excessive sweating, variable appetite, triangular face, frontal bossing, high nasal bridge, long eye lashes, two urethras, micrognathia | 132 bp in exon 1        | Intron 11      | Chr11:2,720,96<br>4-2,721,095 | Present case               |

\*Roman numerals refer to patient identification in the original publications

\*\*Postulated inheritance without genetic testing in parenthesis
